# Supplementary material
Source: PubMed Central journal article supplement (PMC6019292)
Supplement: NIHMS974360-supplement-Supplemental.pdf [file NIHMS974360-supplement-Supplemental.pdf]

## Supporting Information

### Integrated Biosensor for Rapid and Point-Of-Care Sepsis Diagnosis

Jouha Min,<sup>1,2</sup> Maria Nothing,<sup>3</sup> Ben Coble,<sup>1</sup> Hui Zheng,<sup>4</sup> Jongmin Park,<sup>1,2</sup> Hyungsoon Im,<sup>1,2</sup> Georg F. Weber,<sup>3</sup> Cesar M. Castro,<sup>1,5</sup> Filip K. Swirski,<sup>1</sup> Ralph Weissleder,<sup>1,2,6\*</sup> Hakho Lee<sup>1,2\*</sup>

1. Center for Systems Biology, Massachusetts General Hospital, Boston, MA 02114
2. Department of Radiology, Massachusetts General Hospital, Boston, MA 02114
3. Department of Surgery, University Hospital of Erlangen, Erlangen, Germany
4. Biostatistics Center, Massachusetts General Hospital, Boston, MA 02114
5. Department of Medicine, Massachusetts General Hospital, Boston, MA 02114
6. Department of Systems Biology, Harvard Medical School, Boston, MA 02115

\*Corresponding authors: Ralph Weissleder, MD, PhD, Hakho Lee, PhD

[rweissleder@mgh.harvard.edu](mailto:rweissleder@mgh.harvard.edu), [hlee@mgh.harvard.edu](mailto:hlee@mgh.harvard.edu)

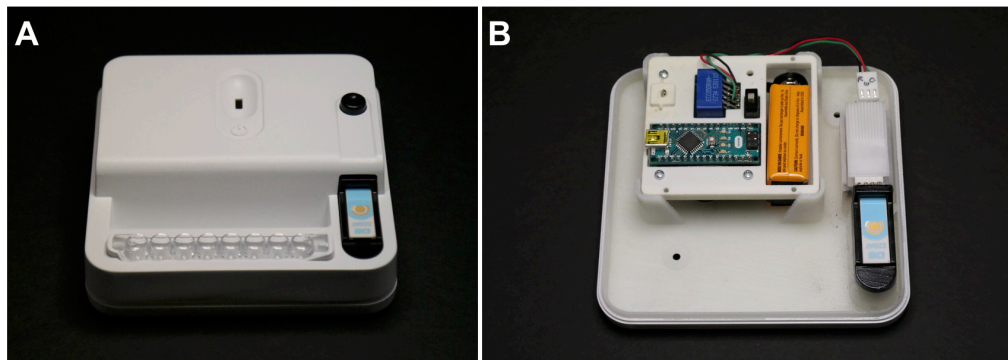

**Figure S1. (A-B)** IBS device exterior and interior.

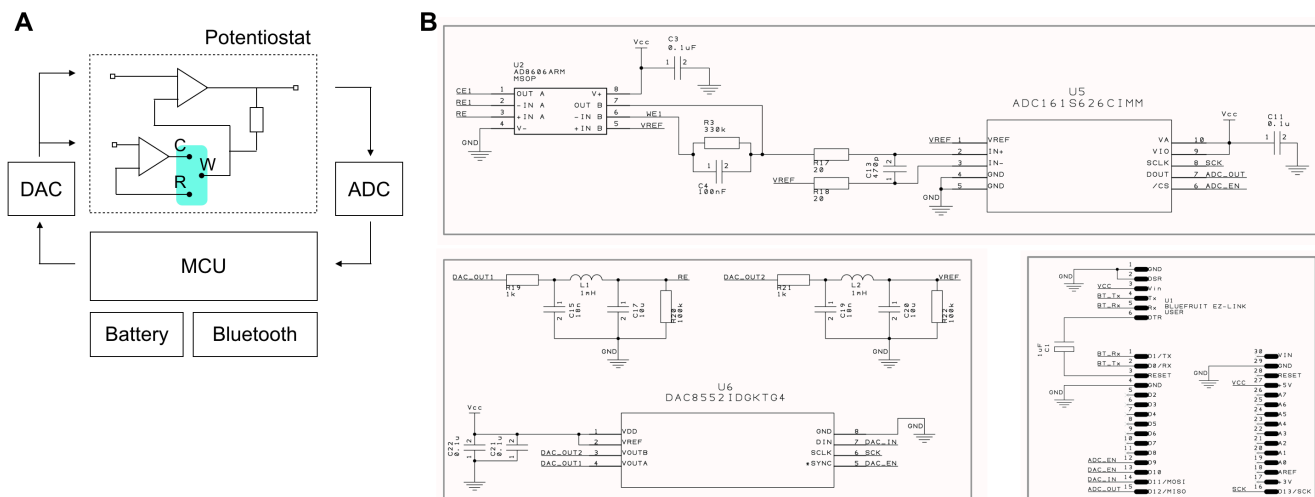

**Figure S2. Circuit schematic.** **(A)** The device housed a custom-designed potentiostat, an analog-to-digital converter (ADC), a digital-to-analog converter (DAC), and a microcontroller unit (MCU). Electrical currents from working (W) to counter (C) electrodes were measured with a constant potential was applied between working and reference (R) electrodes. **(B) (Top)** A potentiostat with an analog-to-digital converter. The operational amplifier (AD8606, Analog Devices) was connected to the parallel circuit of R3 (330 k $\Omega$ ) and C4 (100 nF), which formed a transimpedance amplifier with a low-pass filter with a cut-off frequency 5 Hz. The signal from the working electrode flowed through the transimpedance amplifier and the low-pass filter, and became the input (IN+) of the differential analog-to-digital converter (ADC161S626, Texas Instruments). Another input (IN-) of the analog-digital converter was connected to the VREF, a set value for the electric potential WE1. The difference between two electric potentials (WE1 - VREF) was converted. **(Bottom left)** A digital-to-analog converter (DAC8552, Texas Instruments). The set values for the electric potentials applied to the reference electrode (RE) and the working electrode (VREF) were generated through the digital-to-analog converter. **(Bottom right)** A microcontroller unit (ATmega328, Microchip). It was connected to a bluetooth communication module (Blue fruit EZ-Link, Adafruit).

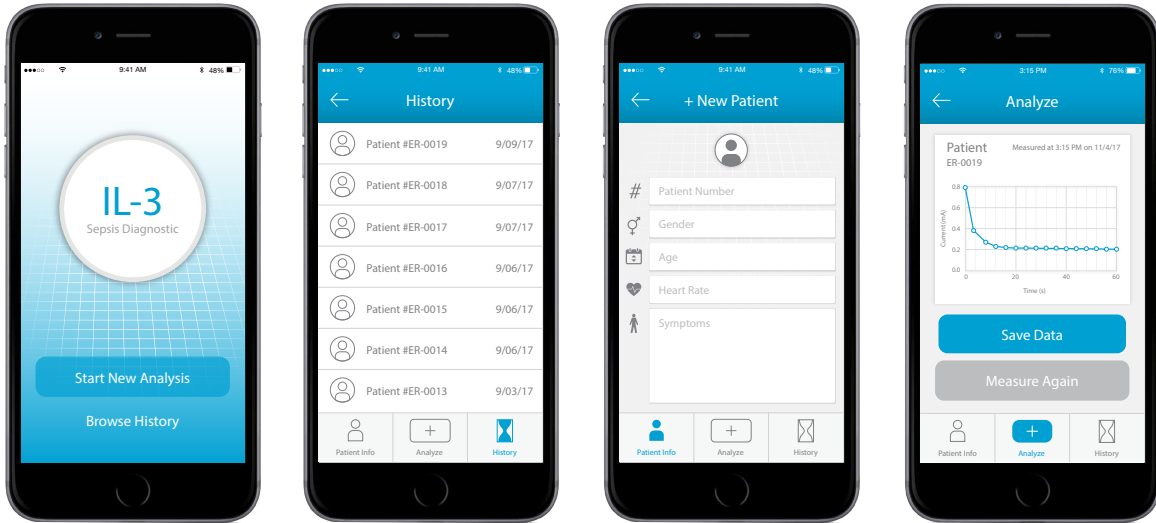

**Figure S3. Screenshots of IBS App user interface.** The smartphone App communicates with the sensor *via* Bluetooth and automatically uploads data to a cloud server. Functions include i) registering new patient information, ii) displaying measurement results, iii) storing measurement value and date/time, and iv) tracking patient history.

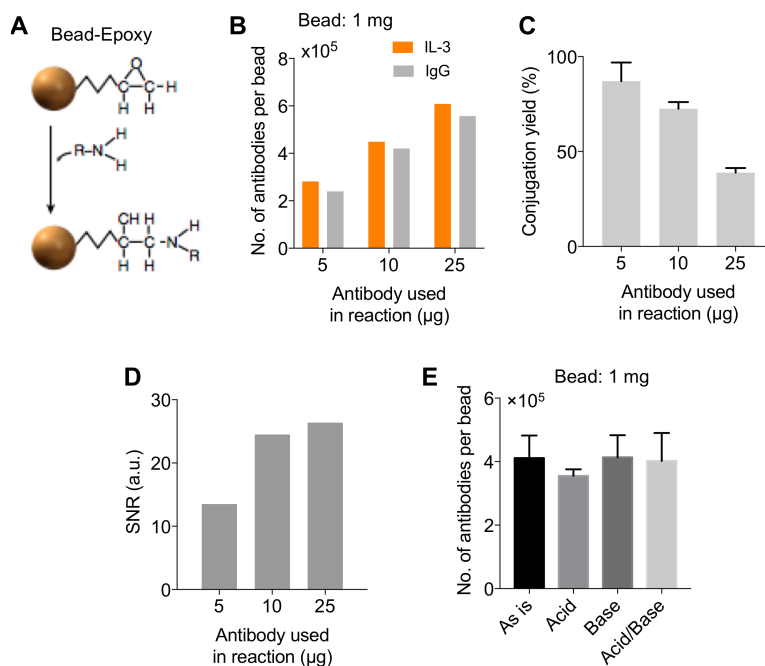

**Figure S4. Optimization of bioconjugation.** **(A)** Conjugation chemistry for attaching antibodies to magnetic beads. **(B)** The number of antibodies per bead was estimated. For a given bead number, antibody concentrations in the reaction were increased. **(C)** The conjugation yield [= antibody bound to beads) / (antibody used in the reaction)] were estimated. The yield was <50% when large amount of antibodies were used. **(D)** Antibody-bead conjugates from (B) were used for electrochemical detection. Higher signal-to-noise ratio (SNR) was observed when magnetic beads with higher number of antibodies were used. But the rate of SNR increase plateaued. **(E)** Antibody-conjugated beads were subject to basic (0.1 M NaOH), acidic (0.1 M HCl), or both type of buffers, and resuspended in PBS. Such pH challenges would break non-covalent bonding including electrostatic or hydrophobic interactions. Antibody amounts on beads, measured by the BCA assay, remained the same after each pH challenge; this results confirmed the covalent interactions between epoxy-coated beads and antibodies.

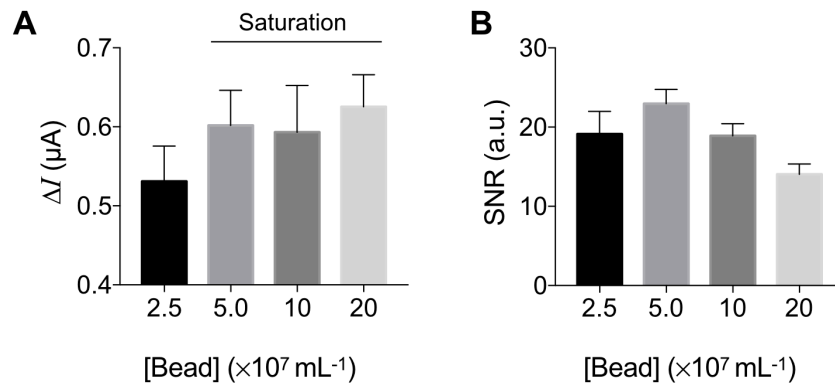

**Figure S5. Optimization of the IBS assay.** (A) Magnetic beads targeting IL-3 were used to detect 1 ng/mL IL-3 in human serum. Bead concentrations  $> 2.5 \times 10^7 \text{ mL}^{-1}$  led to the signal saturation. (B) The optimal bead concentration was set to  $\sim 5.0 \times 10^7 \text{ mL}^{-1}$  (*i.e.*,  $\sim 5.0 \times 10^6$  beads per test) as it resulted in the best signal-to-noise ratio (SNR). The data are displayed as mean  $\pm$  SD from triplicate measurements.

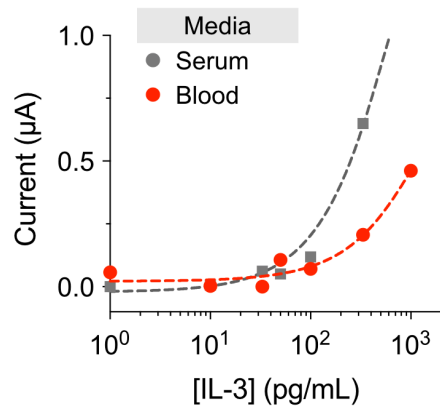

**Figure S6. IBS assay with whole blood.** Varying concentrations of IL-3 were spiked into human whole blood, assayed by IBS, and compared with the serum data.

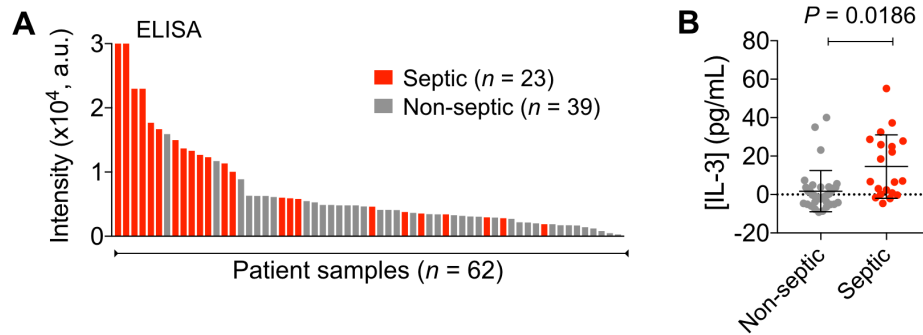

**Figure S7. ELISA analysis.** Patient samples from 23 septic patients and 39 non-septic patients were analyzed with ELISA. **(A)** A waterfall plot shows the ELISA signals sorted from high (left) to low (right). Each column represents a different patient sample (red, septic; grey, non-septic). **(B)** Compared to IBS, ELISA was not as sensitive in distinguishing septic from non-septic controls.  $P$  value was determined by unpaired t-test.  $*P > 0.01$ .



**Table S1. Device Cost and Assay Cost.**

| Component                                            | Cost (\$)    |
|------------------------------------------------------|--------------|
| Analog to digital converter (ADC161S626)             | 7.18         |
| Microcontroller unit (ATmega328)                     | 2.07         |
| Digital to analog converter (DAC8552)                | 3.78         |
| Amplifier (AD8606)                                   | 2.03         |
| Bluetooth module (Bluefruit EZ-link)                 | 22.50        |
| 9V Battery                                           | 1.19         |
| Magnetic pipette (a magnet and 3D printed body)      | 5.00         |
| Others (resistor, capacitance, electric board, case) | 5.00         |
| <b>Total</b>                                         | <b>48.75</b> |

| Reagent & Disposable                                              | Price (\$) | Total amount                      | Amount /test                        | # of tests | Cost/ test (\$) |
|-------------------------------------------------------------------|------------|-----------------------------------|-------------------------------------|------------|-----------------|
| Dynabead M-270 Epoxy (Thermo, 14301)                              | 394.00     | 60 mg (4 × 10 <sup>9</sup> beads) | 0.15 mg (1 × 10 <sup>7</sup> beads) | 400        | 0.99            |
| Human IL-3 Antibody (RnD, MAB603R-01M)                            | 1299.00    | 1000 µg                           | 1.0 µg                              | 1000       | 1.30            |
| Mouse IgG1 Isotype Control (RnD, MAB002)                          | 175.00     | 500 µg                            | 1.0 µg                              | 500        | 0.35            |
| Human IL-3 Biotinylated Antibody (RnD, BAF203)                    | 420.00     | 50 µg                             | 0.05 µg                             | 1000       | 0.42            |
| Streptavidin-HRP (Thermo, 21130)                                  | 202.98     | 0.5 mL                            | 0.05 µL                             | 10000      | 0.02            |
| TMB Substrate Solution (Thermo, 34028)                            | 142.88     | 250 mL                            | 40 µL                               | 6250       | 0.02            |
| 8-tube strip                                                      | 162.97     | 400                               | 2                                   | 200        | 0.81            |
| Disposable tip/cover for Magnetic pipette (ThermoFisher, 4358293) | 95.00      | 125                               | 1                                   | 125        | 0.76            |
| <b>Total</b>                                                      |            |                                   |                                     |            | <b>4.67</b>     |
